# Supplementary material
Source: MDPI journal article supplement (https://www.mdpi.com/2073-4395/11/4/779)
Supplement: s1 [file s1]

## Supplementary Materials

Scheme S1: Description of the test plots.

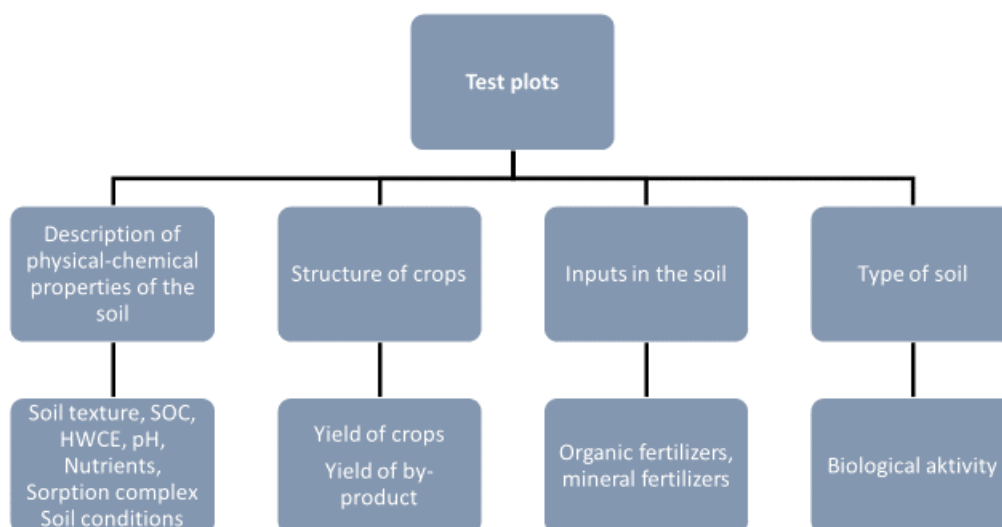

**Table S1:** Average values of SOC according to the type of soil.

|               | SOC 2018 | HWEC 2018 | HWEC 2018 - 2016 |
|---------------|----------|-----------|------------------|
|               | %        | mg/kg     | mg/kg            |
| Albic Luvisol | 1.14     | 335.00    | -123.25          |
| Cambisol      | 1.28     | 448.91    | -116.36          |
| Chernozem     | 1.92     | 456.00    | -84.22           |
| Fluvisol      | 1.49     | 374.60    | -149.00          |
| Luvisol       | 1.38     | 364.36    | -168.18          |
| Planosol      | 1.14     | 500.50    | -38.00           |

**Table S2:** The organic inputs to the soil as a by-product and organic matter of organic fertilizers and digestate.

|             | Yield of by-product | Organic matter of by-product | Organic matter of Digestate (t) | Organic matter of the digestate | Organic matter of Organic fertilizers | Organic matter of all fertilizers | Organic matter including the by-product on land |
|-------------|---------------------|------------------------------|---------------------------------|---------------------------------|---------------------------------------|-----------------------------------|-------------------------------------------------|
|             | t/ha                | t/ha                         | t/ha                            | t/ha                            | t/ha                                  | t/ha                              | t/ha                                            |
| Albeluvisol | 50.39               | 7.06                         | 46.25                           | 0.46                            | 8.08                                  | 8.54                              | 15.6                                            |
| Cambisol    | 29.71               | 8.2                          | 25                              | 0.25                            | 3.17                                  | 3.42                              | 11.62                                           |
| Chernozem   | 38.97               | 18.38                        | 23.78                           | 0.25                            | 2.6                                   | 2.85                              | 21.23                                           |
| Fluvisol    | 53.64               | 14.89                        | 38                              | 0.38                            | 2.89                                  | 3.27                              | 18.16                                           |
| Luvisol     | 45.75               | 14.48                        | 68.33                           | 0.68                            | 3.37                                  | 4.05                              | 18.53                                           |
| Planosol    | 28.42               | 6.36                         | 35                              | 0.35                            | 7.23                                  | 7.58                              | 13.94                                           |

Note: There are given the organic inputs to the soil as a by-product and organic matter of organic fertilizers and digestate, which might be also converted into organic matter. Inputs from the by-products were taken into the account in the case when they stayed in the fields and were not removed. As it is evident, the total amount of organic matter differs with soil type. While chernozems are characterised by a low amount of applied organic fertilizers, the total amount of organic matter entering the soil is very high due to the very high yields of arable crops. A description of the variables entering into the calculations is given in Supplementary Materials (Table S4 and S5). This appendix lists all the variables that were included in the following regression analyses. Because some variables were insignificant in the regression analyses, only some are used.

**Table S3:** Mean values of the soil chemical, physical and biological properties.

| Variable                                          | Unit     | N   | Mean    | Std. Deviation | Geometric Mean | Variance |
|---------------------------------------------------|----------|-----|---------|----------------|----------------|----------|
| Soil texture topsoil <0,001                       | %        | 517 | 18.503  | 6.587          | 17.181         | 43.391   |
| Soil texture topsoil [<0,01;0,001]                | %        | 517 | 18.751  | 4.439          | 18.253         | 19.705   |
| Soil texture topsoil [<0,05;0,01]                 | %        | 517 | 46.362  | 11.482         | 44.525         | 131.836  |
| Soil texture topsoil [<0,25;0,05]                 | %        | 517 | 10.865  | 8.297          | 8.090          | 68.844   |
| Soil texture topsoil [<0,2;2,00]                  | %        | 517 | 5.734   | 8.136          | 2.543          | 66.203   |
| Coefficient of stoniness                          | -        | 513 | 0.997   | 0.014          | 0.996          | 0.000    |
| Coefficient of slope                              | -        | 513 | 0.991   | 0.020          | 0.991          | 0.000    |
| Depth of soil                                     | category | 513 | 1.000   | 0.000          | 1.000          | 0.000    |
| pH (KCl)                                          | degree   | 498 | 6.167   | 0.735          | 6.124          | 0.540    |
| Cox                                               | %        | 498 | 1.550   | 0.417          | 1.499          | 0.174    |
| Total N                                           | Kg/ha    | 425 | 132.214 | 82.245         | 104.999        | 6764.274 |
| Mineral N                                         | Kg/ha    | 345 | 139.051 | 64.027         | 122.695        | 4099.467 |
| Mineral P <sub>2</sub> O <sub>5</sub> dosage      | Kg/ha    | 501 | 31.597  | 41.364         | 0.000          | 1710.991 |
| K <sub>2</sub> O inputs                           | Kg/ha    | 501 | 37.757  | 78.097         | 0.000          | 6099.084 |
| Organic matter of byproduct                       | Kg/ha    | 487 | 5.078   | 7.013          | 0.000          | 49.185   |
| Technological and organic matter                  | %        | 487 | 0.000   | 0.004          | 0.000          | 0.000    |
| Digestate organic matter                          | %        | 487 | 0.053   | 0.144          | 0.000          | 0.021    |
| Digestate and technological watter organic matter | %        | 487 | 0.053   | 0.145          | 0.000          | 0.021    |

|                                                                           |            |     |         |        |         |          |
|---------------------------------------------------------------------------|------------|-----|---------|--------|---------|----------|
| <b>Organic matter of animal origin</b>                                    | %          | 517 | 0.908   | 2.740  | 0.000   | 7.509    |
| <b>Organic matter of green manure</b>                                     | %          | 517 | 1.812   | 4.173  | 0.000   | 17.412   |
| <b>Organic matter of by-products and green manure</b>                     | %          | 517 | 4.694   | 7.686  | 0.000   | 59.082   |
| <b>Organic matter total</b>                                               | %          | 517 | 6.506   | 8.990  | 0.000   | 80.812   |
| <b>Biological life in soil</b>                                            | category   | 513 | 4.209   | 0.751  | 4.137   | 0.564    |
| <b>Soil texture range in topsoil, &lt;0,01 mm</b>                         | %          | 513 | 35.883  | 6.227  | 35.296  | 38.782   |
| <b>Soil texture range in undersoil, &lt;0,01 mm</b>                       | %          | 513 | 37.863  | 5.770  | 37.349  | 33.291   |
| <b>Variation range of soil texture undersoil &lt;0,001 mm</b>             | %          | 513 | 39.842  | 4.365  | 39.588  | 19.053   |
| <b>Altitude</b>                                                           | MSL        | 513 | 328.738 | 91.564 | 317.310 | 8383.926 |
| <b>Texture of soil grain six ranges</b>                                   | category   | 513 | 2.830   | 0.671  | 2.750   | 0.450    |
| <b>Depth of the topsoil</b>                                               | cm         | 447 | 25.593  | 5.231  | 0.000   | 27.363   |
| <b>Overall expert assessment of soil condition</b>                        | category   | 470 | 2.103   | 0.357  | 2.074   | 0.127    |
| <b>Soil adsorption complex characteristics 2018</b>                       | %          | 439 | 29.325  | 29.096 | 23.055  | 846.563  |
| <b>Maximum adsorption capacity topsoil 2018</b>                           | mmol+/100g | 439 | 30.551  | 28.702 | 24.678  | 823.810  |
| <b>Saturation of exchangeable bases content (mmol+/100g) Topsoil 2018</b> | mmol+/100g | 439 | 93.551  | 4.895  | 93.421  | 23.965   |
| <b>Number of Years before 2018, 2018 = 1</b>                              | 1          | 198 | 2.136   | 0.778  | 1.971   | 0.606    |

**Table S4:** Mean values of the crops.

| Crop                                               | Area<br>(ha) | Nitrogen         | P2O5             | K2O              | Yield<br>t/ha | Ploughing<br>1yes/0 no | Organic<br>matter<br>t/ha | Digestate<br>t OM/ha |
|----------------------------------------------------|--------------|------------------|------------------|------------------|---------------|------------------------|---------------------------|----------------------|
|                                                    |              | mineral<br>kg/ha | mineral<br>kg/ha | mineral<br>kg/ha |               |                        |                           |                      |
| Potatoes                                           | 17.43        | 102.94           | 59.49            | 98.77            | 28.73         | 0.38                   | 7.44                      | 0.0375               |
| Sugar beet                                         | 19.75        | 86.70            | 26.78            | 56.36            | 71.13         | 0.45                   | 8.87                      | 0.0404               |
| White mustard                                      | 15.52        | 98.50            | 11.70            | 15.47            | 1.79          | 0.80                   | 2.56                      | 0.0000               |
| Peas sown                                          | 35.58        | 12.00            | 26.00            | 0.00             | 11.17         | 0.00                   | 14.52                     | 0.0000               |
| Table peas                                         | 36.01        | 12.00            | 52.00            | 0.00             | 5.91          | 0.67                   | 4.73                      | 0.0000               |
| Spring barley                                      | 36.56        | 86.22            | 49.66            | 31.75            | 7.41          | 0.20                   | 4.82                      | 0.0236               |
| Corn on pressed<br>grain                           | 18.90        | 114.98           | 12.79            | 16.37            | 8.49          | 0.62                   | 4.49                      | 0.0000               |
| Corn for silage                                    | 26.01        | 151.17           | 54.09            | 69.11            | 45.72         | 0.51                   | 12.29                     | 0.1422               |
| Legume cereal<br>mixture + clover<br>(undersowing) | 36.30        | 199.72           | 90.69            | 113.18           | 10.89         | 0.35                   | 11.68                     | 0.1241               |
| Poppy seed                                         | 27.89        | 64.55            | 34.05            | 17.04            | 0.98          | 0.63                   | 4.85                      | 0.0000               |
| Ergot                                              | 21.82        | -                | 0.00             | 0.00             | 1.29          | 0.83                   | 5.17                      | 0.0000               |
| Oat                                                | 10.70        | 81.00            | 19.27            | 7.60             | 7.23          | 1.00                   | 9.54                      | 0.0333               |
| Spring wheat                                       | 39.35        | 108.97           | 26.30            | 26.30            | 7.21          | 0.33                   | 6.89                      | 0.0000               |
| Winter wheat                                       | 18.24        | 169.04           | 14.66            | 30.27            | 7.24          | 0.41                   | 4.05                      | 0.0460               |
| Winter rape                                        | 22.19        | 192.47           | 37.87            | 21.31            | 3.88          | 0.44                   | 7.88                      | 0.0389               |
| Lucerne                                            | 13.03        | 26.25            | 6.83             | 8.00             | 26.68         | 0.50                   | 0.13                      | 0.0333               |
| Rye Biogas                                         | 21.40        | -                | 0.00             | 0.00             | 9.70          | 1.00                   | 8.06                      | 0.0000               |
| Winter rye                                         | 16.48        | 99.92            | 7.75             | 2.75             | 15.30         | 0.50                   | 9.03                      | 0.0000               |
| <b>Total</b>                                       | <b>24.51</b> | <b>139.05</b>    | <b>31.60</b>     | <b>37.76</b>     | <b>19.82</b>  | <b>0.42</b>            | <b>6.51</b>               | <b>0.0531</b>        |

**Table S5.** Multidimensional linear regression model for HWEC content (the year 2018).

| Coefficients |                                                                           |                             |            |                           |        |       |
|--------------|---------------------------------------------------------------------------|-----------------------------|------------|---------------------------|--------|-------|
| Model        |                                                                           | Unstandardized Coefficients |            | Standardized Coefficients | t      | Sig.  |
|              |                                                                           | B                           | Std. Error | Beta                      |        |       |
| 11           | Constant                                                                  | -                           | 1364.042   | 959.365                   |        |       |
|              | Mineral P <sub>2</sub> O <sub>5</sub> dosage (kg/ha)                      | -4.433                      | 1.591      | -0.586                    | -2.787 | 0.010 |
|              | Digestate and technological water organic matter                          | 1658.075                    | 574.035    | 0.561                     | 2.888  | 0.008 |
|              | Saturation of exchangeable bases content (mmol+/100g) in the topsoil 2018 | 24.437                      | 10.926     | 0.398                     | 2.237  | 0.034 |
|              | Total N                                                                   | -2.521                      | 1.335      | -0.387                    | -1.888 | 0.070 |

**Table S6.** Refined multidimensional linear regression model for HWEC in 2018.

| Variable                                                                               | B (approx.) | Std. Error | Result | Probability | Lower limit  | Upper limit  |
|----------------------------------------------------------------------------------------|-------------|------------|--------|-------------|--------------|--------------|
| <b>Constant</b>                                                                        | -800.3514   | 175.9486   | Sign.  | 8.87E-05    | -<br>1160.21 | -<br>440.496 |
| <b>Mineral P<sub>2</sub>O<sub>5</sub> dosage (kg ha<sup>-1</sup>)</b>                  | -0.6288     | 0.2335     | Sign.  | 0.0116      | -1.1065      | -0.1511      |
| <b>Digestate and technological water organic matter</b>                                | 166.8419    | 65.3105    | Sign.  | 0.0161      | 33.2668      | 300.417      |
| <b>Saturation of exchangeable bases content (mmol+ 100g<sup>-1</sup>) Topsoil 2018</b> | 13.7785     | 1.9198     | Sign.  | 6.71E-08    | 9.85203      | 17.7051      |
| <b>Total N</b>                                                                         | -0.3154     | 0.1519     | Sign.  | 0.0468      | -0.6260      | -0.0047      |

**Table S7.** Multidimensional linear regression model for HWEC difference (period 2008–2018).

| <b>Coefficients</b> |                                                             |            |                           |         |         |        |
|---------------------|-------------------------------------------------------------|------------|---------------------------|---------|---------|--------|
| Model               | Unstandardized Coefficients                                 |            | Standardized Coefficients | t       | Sig.    |        |
|                     | B                                                           | Std. Error | Beta                      |         |         |        |
| 7                   | Constant                                                    | -1998.4895 | 881.3441                  |         | -2.2675 | 0.0256 |
|                     | Digestate organic matter                                    | 570.2867   | 203.3981                  | 0.2836  | 2.8038  | 0.0061 |
|                     | K <sub>2</sub> O inputs                                     | -0.8128    | 0.6343                    | -0.1393 | -1.2815 | 0.2030 |
|                     | pH (KCl)                                                    | -99.9548   | 104.6603                  | -0.2608 | -0.9550 | 0.3419 |
|                     | Maximum adsorption capacity (mmol+/100g) topsoil 2008       | -33.2229   | 6.1221                    | -0.7234 | -5.4267 | 0.0000 |
|                     | Overall expert assessment of soil condition                 | -445.8829  | 91.1054                   | -0.5115 | -4.8941 | 0.0000 |
|                     | Soil texture topsoil [<0,25;2.00]                           | 8.2161     | 2.1590                    | 0.3415  | 3.8055  | 0.0002 |
|                     | Saturation of adsorption capacity (mmol+/100g) topsoil 2018 | 40.1689    | 16.2613                   | 0.7154  | 2.4702  | 0.0152 |

**Table S8.** Refined multidimensional linear regression model for HWEC Difference (period 2018-2016).

| Variable                                                           | B (approx.) | Std. Error | Result          | Probability | Lower limit | Upper limit |
|--------------------------------------------------------------------|-------------|------------|-----------------|-------------|-------------|-------------|
| <b>Constant</b>                                                    | 542.6295    | 47.5988    | Sign.           | 0           | 448.3453    | 636.9137    |
| <b>Digestate organic matter</b>                                    | 156.3642    | 34.5987    | Sign.           | 1.51E-05    | 87.83075    | 224.8978    |
| <i>K<sub>2</sub>O inputs</i>                                       | -0.1025     | 0.07174    | <i>NotSign.</i> | 0.155613    | -0.24466    | 0.039563    |
| <b>pH (KCl)</b>                                                    | -114.4247   | 10.0059    | Sign.           | 0           | -134.245    | -94.605     |
| <i>Maximum adsorption capacity (mmol+/100g) topsoil 2008</i>       | 1.6734      | 1.10854    | <i>NotSign.</i> | 0.133894    | -0.52238    | 3.869259    |
| <b>Overall expert assessment of soil condition</b>                 | -37.8306    | 13.5679    | Sign.           | 0.006203    | -64.7061    | -10.9552    |
| <i>Soil texture topsoil [&lt;0,25;2.00]</i>                        | 0.9948      | 0.59528    | <i>NotSign.</i> | 0.097403    | -0.18431    | 2.173987    |
| <b>Saturation of adsorption capacity (mmol+/100g) topsoil 2018</b> | 2.3033      | 0.17213    | Sign.           | 0           | 1.962344    | 2.644258    |

**Table S9.** The multidimensional linear regression model for the model SOC Difference between the years 2018 and 2008.

| Model |                                                                           | Unstandardized Coefficients |            | Standardized Coefficients | t      | Sig.  | Collinearity Statistics |       |
|-------|---------------------------------------------------------------------------|-----------------------------|------------|---------------------------|--------|-------|-------------------------|-------|
|       |                                                                           | B                           | Std. Error | Beta                      |        |       | Tolerance               | VIF   |
| 10    | Constant                                                                  | 1.395                       | 0.351      |                           | 3.977  | 0.000 |                         |       |
|       | Difference HWEC 2018 – 2008                                               | 0.001                       | 0.000      | 0.346                     | 3.001  | 0.004 | 0.936                   | 1.069 |
|       | Soil texture, percentage of particles smaller than 0,01 - 0.001 mm (ST01) | -0.016                      | 0.006      | -0.305                    | -2.632 | 0.011 | 0.926                   | 1.080 |
|       | Soil texture of topsoil - percentage of particles 0.25-2.00 mm (ST2)      | -0.013                      | 0.004      | -0.439                    | -3.408 | 0.001 | 0.748                   | 1.336 |
|       | Organic matter from applied organic manures farmyard manure (FYM_OM)      | 0.011                       | 0.006      | 0.212                     | 1.735  | 0.089 | 0.834                   | 1.198 |
|       | pH (KCl)                                                                  | -0.079                      | 0.041      | -0.249                    | -1.910 | 0.062 | 0.731                   | 1.369 |
|       | Energy of NPK + the energy of the by-product left on the field (ENPKB)    | -2.305E-07                  | 0.000      | -0.302                    | -2.519 | 0.015 | 0.865                   | 1.156 |
|       | Subsoil depth (SSD)                                                       | -0.006                      | 0.003      | -0.232                    | -1.957 | 0.056 | 0.887                   | 1.127 |

Notes on the regression model: In the analysis of variables in the model, the variables that correlated with the difference in humus between 2018 and 2008 were considered. The following variables were included: the HWEC values from 2018 minus the HWEC values from 2008 (Difference HWEC 2018 – 2008), energy difference (ED), maximum adsorption capacity (MACT), V\_topsoil, Soil texture - the percentage of particles smaller than 0.001 mm (STS001), Soil texture of topsoil, - the

percentage of particles 0.01-0.05 mm (ST05), Soil texture of topsoil - the percentage of particles 0.05-0.25 mm (ST025), Soil texture of topsoil – the percentage of particles 0.25-2.00 mm (ST2), Organic matter from applied FYM (t), pH (KCl) Biological activity of soil Category (BAC), Subsoil depth (SSD) and Topsoil depth (TSD). Of these variables, the energy potential of the soil (EPT), which was excluded in the last design of the model, and the maximum sorption capacity in topsoil (MACT), which was excluded in the 8<sup>th</sup> model, were of great importance for the creation of the regression model.

**Table S10.** Refined multidimensional linear regression model for the dependence of the model SOC Difference between the years 2018 and 2008.

| Variable        | B (approximation) | Std. Error | result      | Probability | Lower limit | Upper limit |
|-----------------|-------------------|------------|-------------|-------------|-------------|-------------|
| Constant        | 1.249448          | 0.133894   | Significant | 1.56E-12    | 0.980515    | 1.518382    |
| Difference HWEC | 0.000326          | 7.99E-05   | Significant | 0.000162    | 0.000166    | 0.000487    |
| ST01            | -0.01226          | 0.002007   | Significant | 1.48E-07    | -0.0163     | -0.00823    |
| ST2             | -0.01388          | 0.00141    | Significant | 2.70E-13    | -0.01671    | -0.01105    |
| FYM_OM          | 0.009112          | 0.002108   | Significant | 7.34E-05    | 0.004878    | 0.013346    |
| pH (KCl)        | -0.06761          | 0.015058   | Significant | 4.21E-05    | -0.09786    | -0.03737    |
| ENPKB           | -3.68E-07         | 3.79E-08   | Significant | 4.38E-13    | -4.44E-07   | -2.92E-07   |
| SSD             | -0.00537          | 0.001016   | Significant | 2.79E-06    | -0.00741    | -0.00333    |

Note: Difference HWEC - difference HWEC 2018 - 2008, ST01 - soil texture, percentage of particles smaller than 0,01-0.001 mm, ST2 - soil texture of topsoil - the percentage of particles 0.25-2.00 mm, FYM\_OM - organic matter from applied organic manures farmyard manure, pH (KCl) - soil reaction, ENPKB - the energy of NPK + the energy of the by-product left on the field, SSD - subsoil depth.

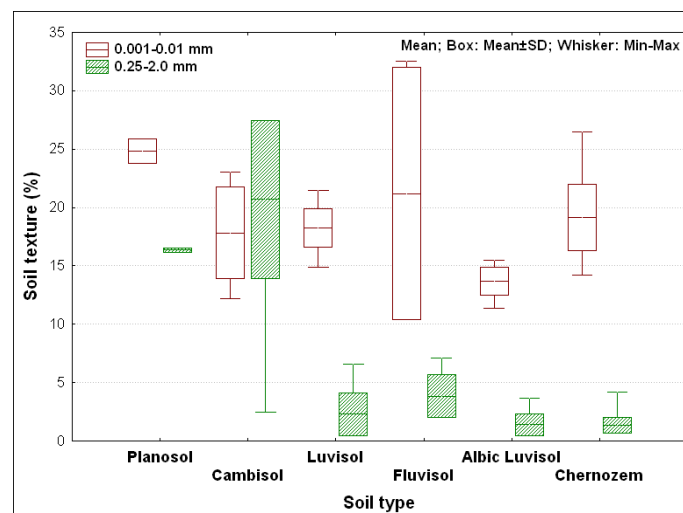

**Figure S1:** The average soil texture (%) according to the soil type (2008–2018).

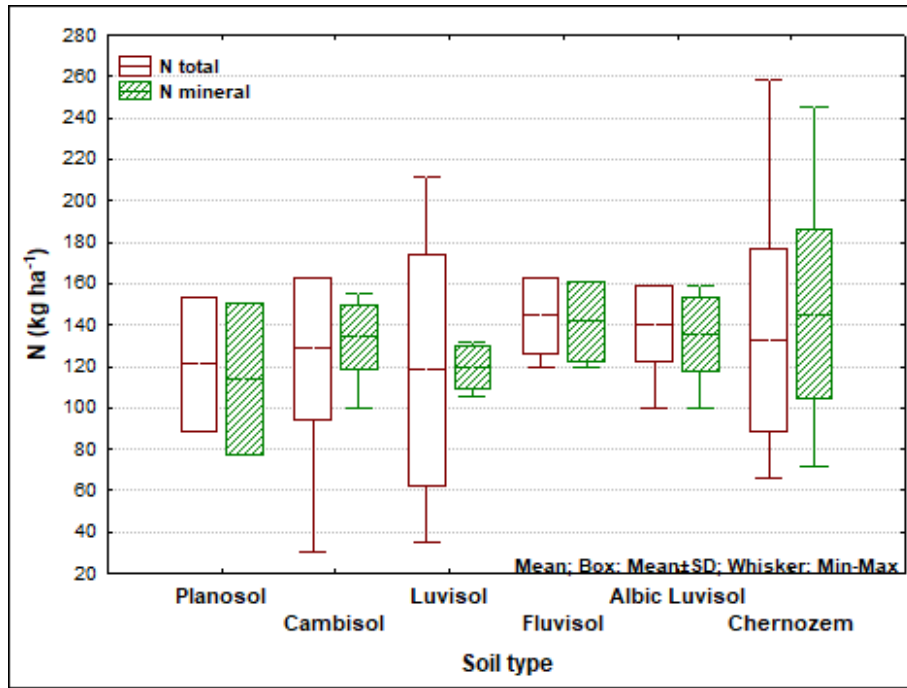

**Figure S2:** Average input of N (total and mineral) into the soil in fertilizers for the period 2008-2018 and individual soil types.

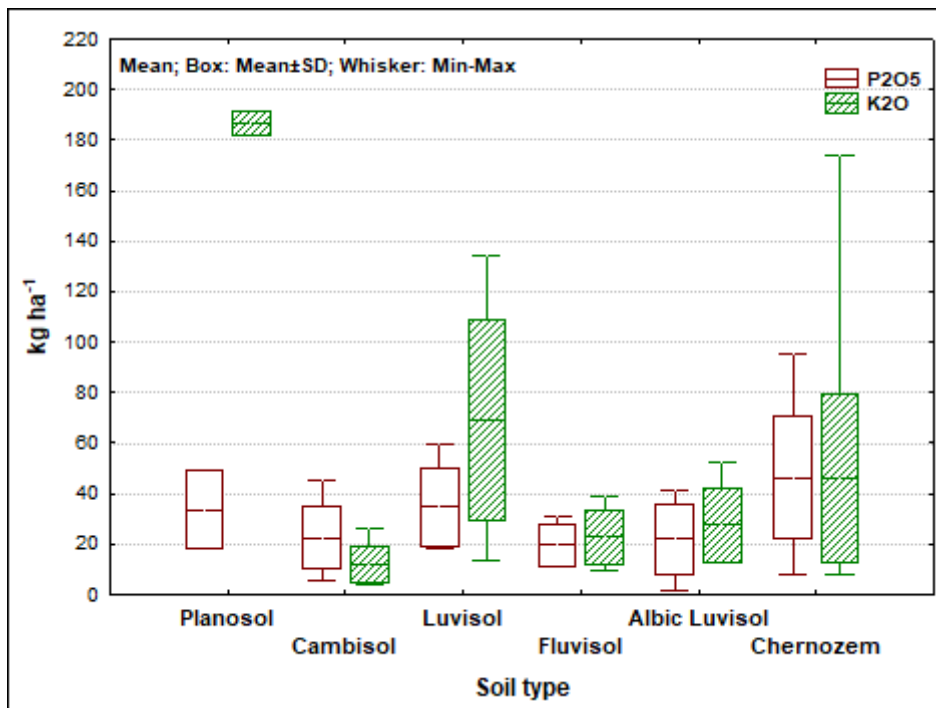

**Figure S3:** Average input of P and K (total and mineral) into the soil in fertilizers for the period 2008-2018 and individual soil types.



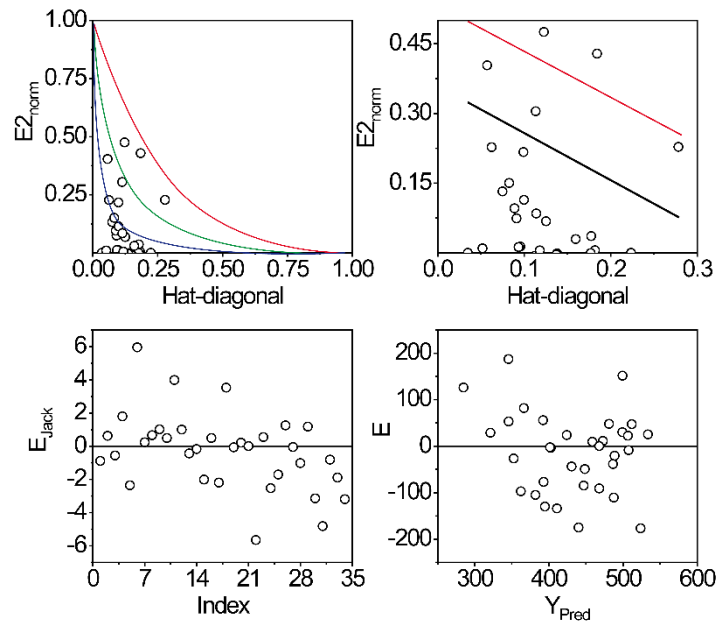

**Figure S4.** The residual analysis for multidimensional linear regression model by (a) L-R plot, (b) Pregibon, (c) Jackknife residues and (d) predicted residues after data filtering. The HWEC soil content in the 2018 model.

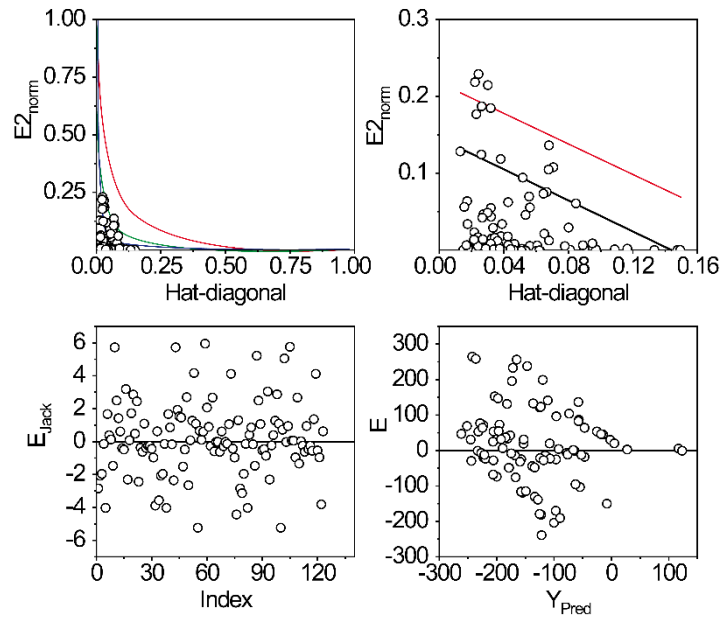

**Figure S5.** The residual analysis for multidimensional linear regression model by (a) L-R plot, (b) Pregibon, (c) Jackknife residues and (d) predicted residues after data filtering (the HWEC difference 2008–2018/).

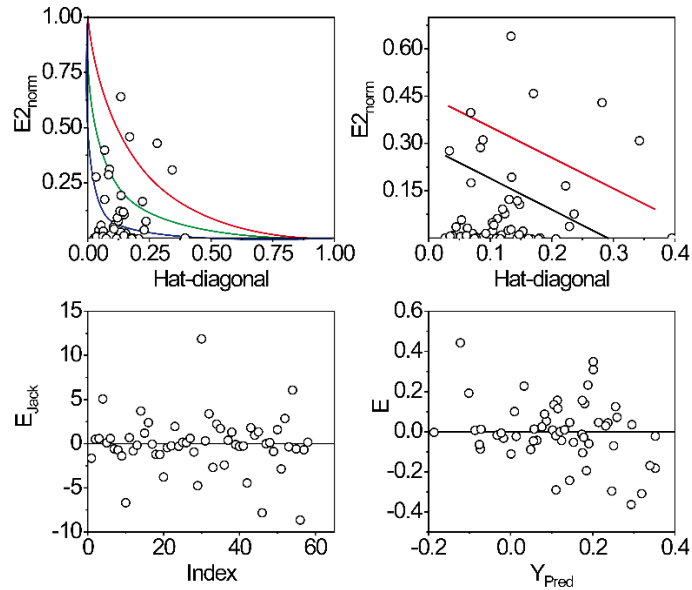

**Figure S6.** The residual analysis for multidimensional linear regression model by (a) L-R plot, (b) Pregibon, (c) Jackknife residues and (d) predicted residues after data filtering (Model: SOC Difference between the years 2018 and 2008).

**Text S1:** Expert assessment of the level of soil care for land monitored

Expert assessment of the soil evaluates the current condition of the land, i.e. how farmers take care to maintain natural soil fertility. Fertility is assessed by several qualitative parameters (kind of soil, soil-forming substrate, hydromorphic development, soil skeleton etc.), which are considerably different for some soil types. It would be difficult to achieve a reasonably objective evaluation of the care of the land that has significantly different soil types and thus qualitative parameters. Generally, the natural soil fertility is significantly different, for example, between the modal black soils formed on loess and the modal cambium (formerly brown soils). Soil care is evaluated mainly in a subjective way and places considerable demands on the expertise and experience of the relevant expert. Objective measurements (soil resistance measured by a penetrometer) and topsoil depth were used to evaluate the level of care.

Other evaluations are performed subjectively - the assessment of the topsoil structure, the compaction degree of the subsoil and the overall synthetic evaluation of the level of soil care. The structure evaluation in the topsoil is based on the classification levels set by Špička [1], but also on the work of other authors, e.g. Němeček [2], Šimon [3], Tomášek [4]. When assessing the structure of the topsoil, the following categories are regarded: I - very good structure (significant crumbly structure, crumbs mostly 1-10 mm in size), II - good structure (less pronounced crumbly structure, crumbs with a size mostly 1-20 mm), disturbed structure, crumbs with a size of 10-20 mm), III - lumpy or disturbed structure (unstable structures, which sometimes break down and can become even non-structural), IV - lumpy or powdery structure (due to precipitation it easily dissolves and hardens after drying v coherent, compact mass), V - non-structural soil (usually heavy soil, which, after tillage at excessive humidity, creates so-called pseudo-structured elements of larger dimensions, which are difficult to disconnect after soaking - the so-called benches.

Light textured soils, which tend to be non-structural and exclude a good level of soil care in their category, are excluded from this classification. Non-structural topsoils or subsoils, and some structural elements (eg. polyhedral, cube, prismatic, columnar) can be well cared for. The subsoil can have prismatic, columnar, plate-like and other structures, which are formed, for example, by pressure during the tillage. The following categories are used to evaluate compaction: I - low compaction, II - low to medium compaction, III - medium compaction, IV- medium to high compaction, high compaction. Biological activity can be evaluated according to the number of earthworms in a given probe: 1st category: more than 20 adult earthworms, 2: 5-20 earthworms, 3: up to 5 earthworms. The evaluation of the overall care of the land on a given plot (synthetic indicator) is as follows: 1 - good, 2 - medium, 3 - low.

## References

1. Špička, A. Soil properties and its treatment (Vlastnosti půdy a její zpracování); 1. vyd.; Praha : SZN: Praha, 1964.
2. Němeček, J.V. Soil and soil cover, their properties, transformation and transport processes (Půda a půdní pokryv, jejich vlastnosti, transformační a transportní procesy) Available online: [https://primo.uzei.cz/primo-explore/fulldisplay?docid=uzp01000096244&context=L&vid=uzeinew&lang=cs\\_CZ&search\\_scope=uzei&adaptor=Local](https://primo.uzei.cz/primo-explore/fulldisplay?docid=uzp01000096244&context=L&vid=uzeinew&lang=cs_CZ&search_scope=uzei&adaptor=Local) Search Engine&tab=default\_tab&query=any,contains,Němeček půda&offset=0 (accessed on Jan 12, 2021).
3. Šimon, Josef, Lhotský Jiří, Bambásek, Z. Soil cultivation and fertilization (Zpracování a zúrodnování půd); SZN Print. Rostlinná výroba: Praha, 1989; ISBN 80-209-0048-9.
4. Tomášek Milan Soils of the Czech Republic (Půdy České republiky); 2. dopl. v.; Praha : Český geologický ústav: Praha, 2000.
